# Supplementary material
Source: PubMed Central journal article supplement (PMC3792438)

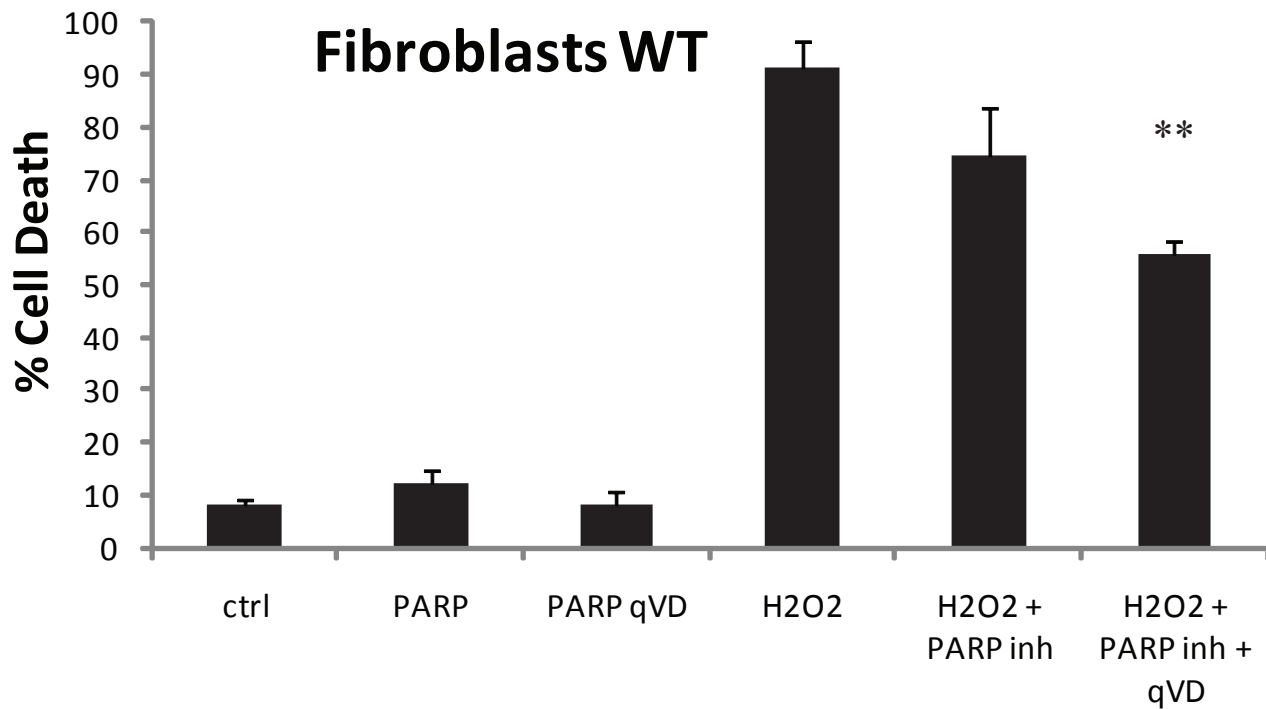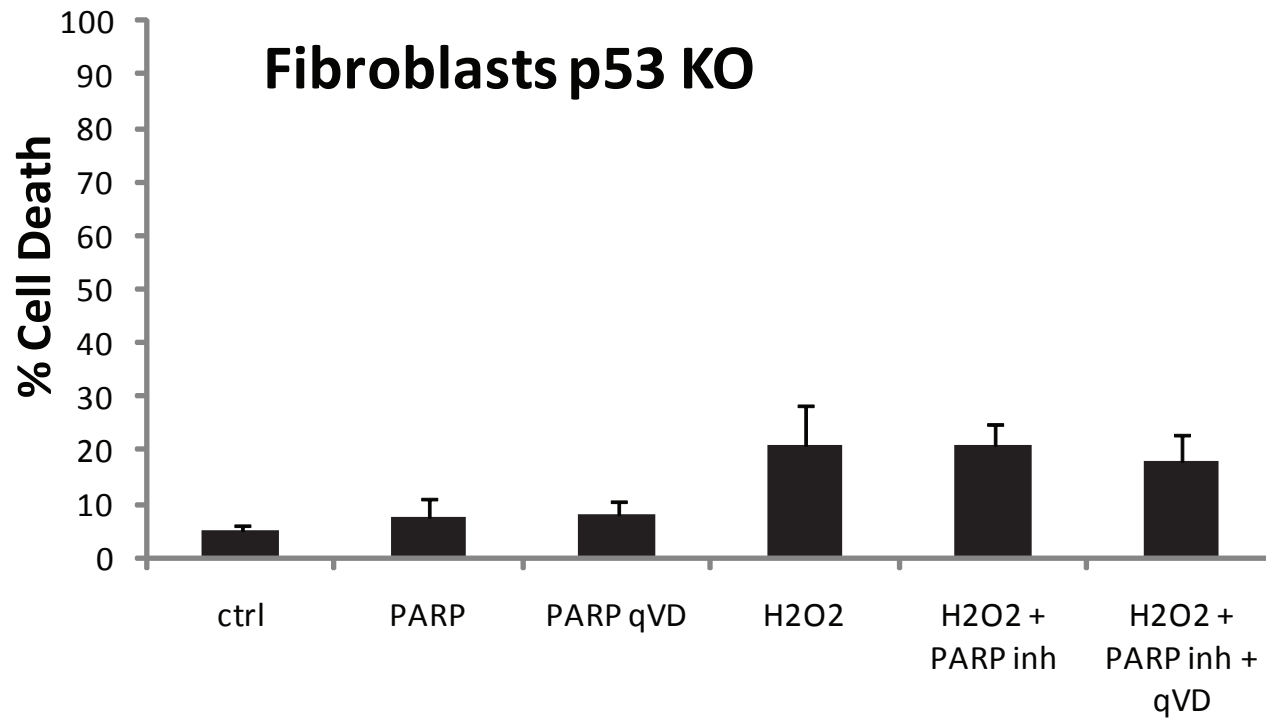

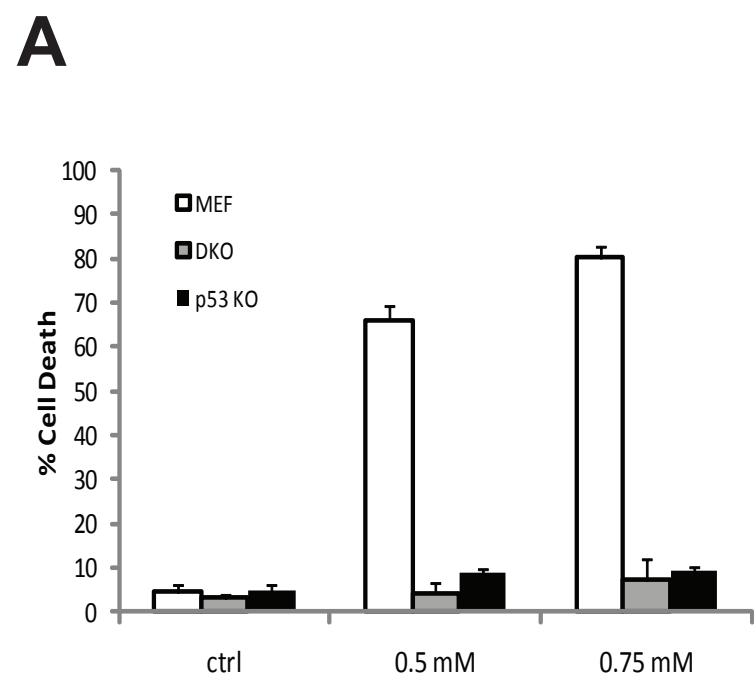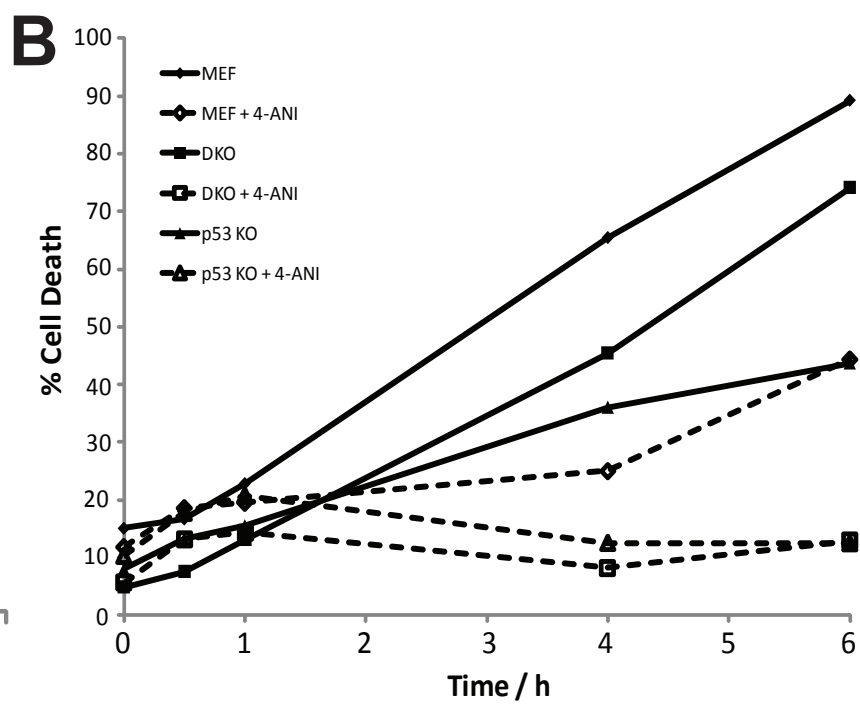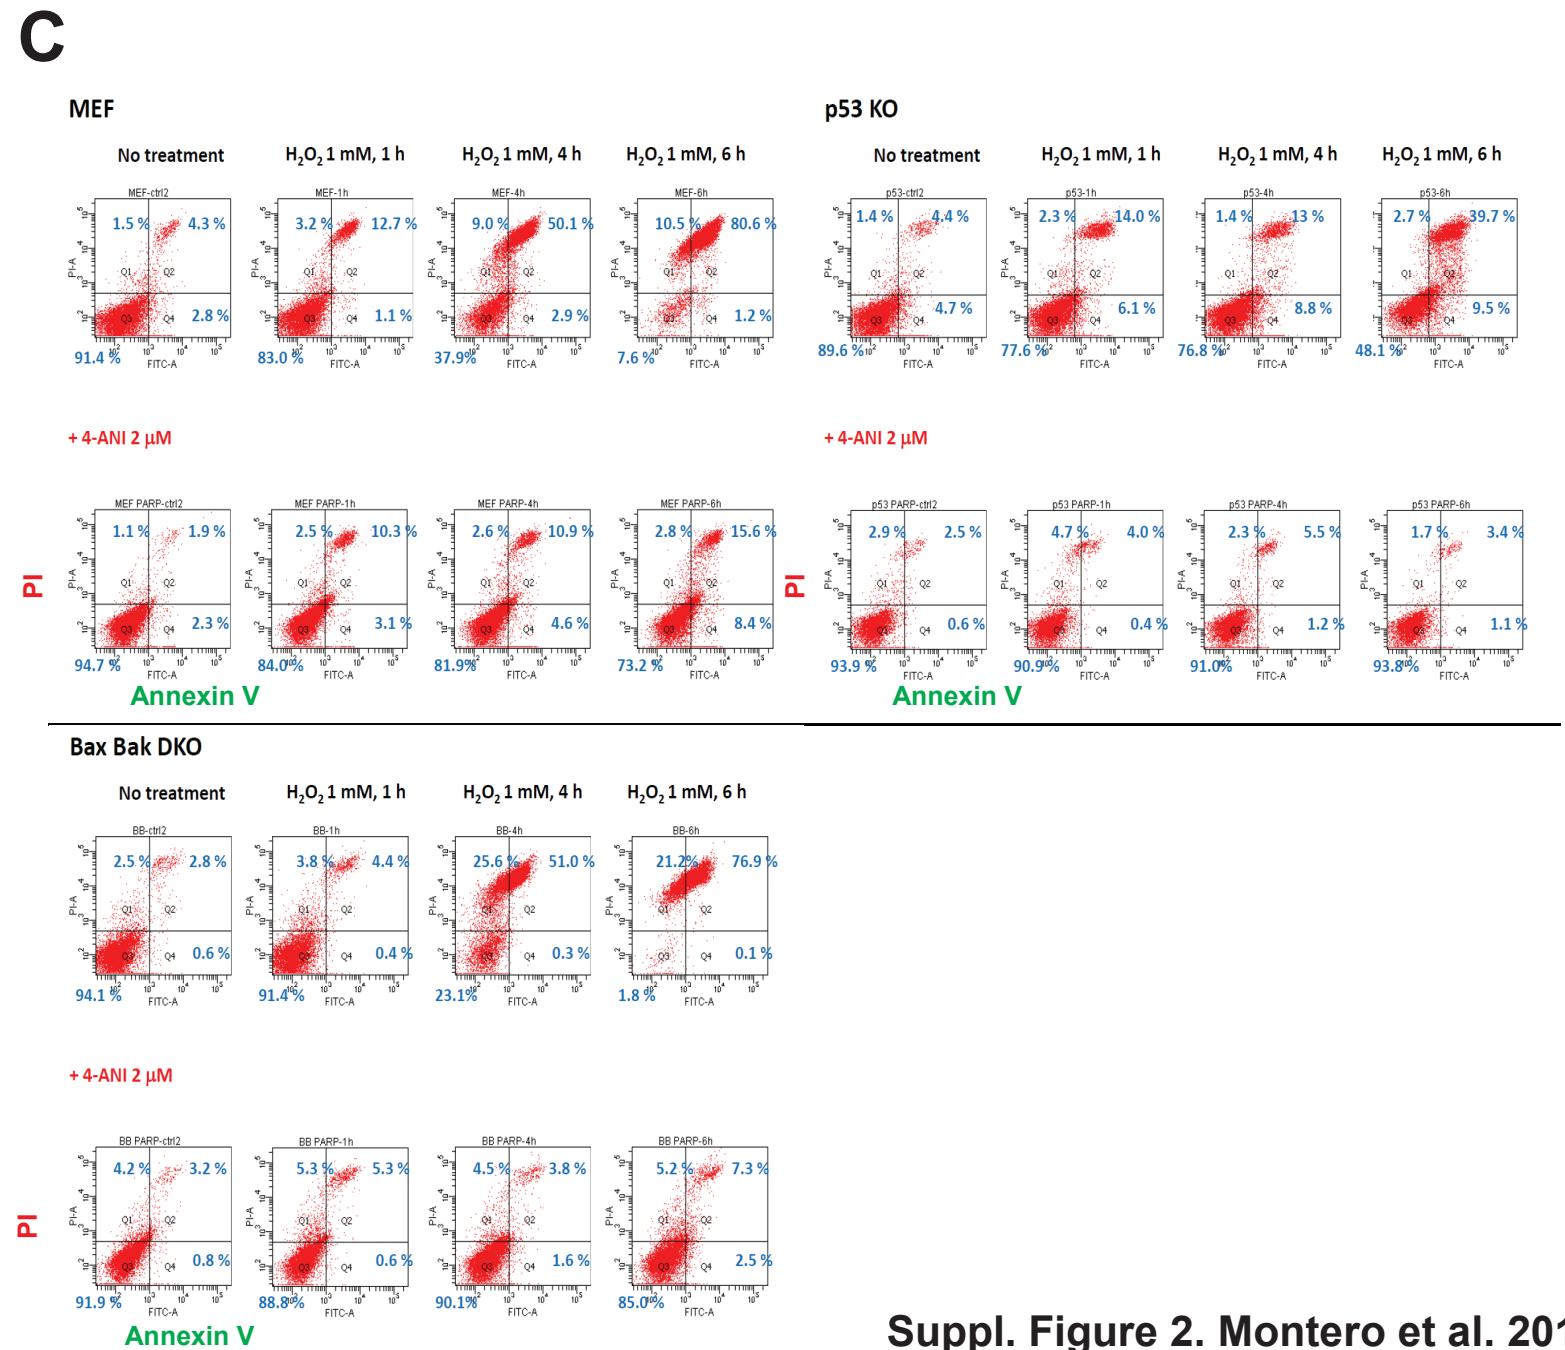

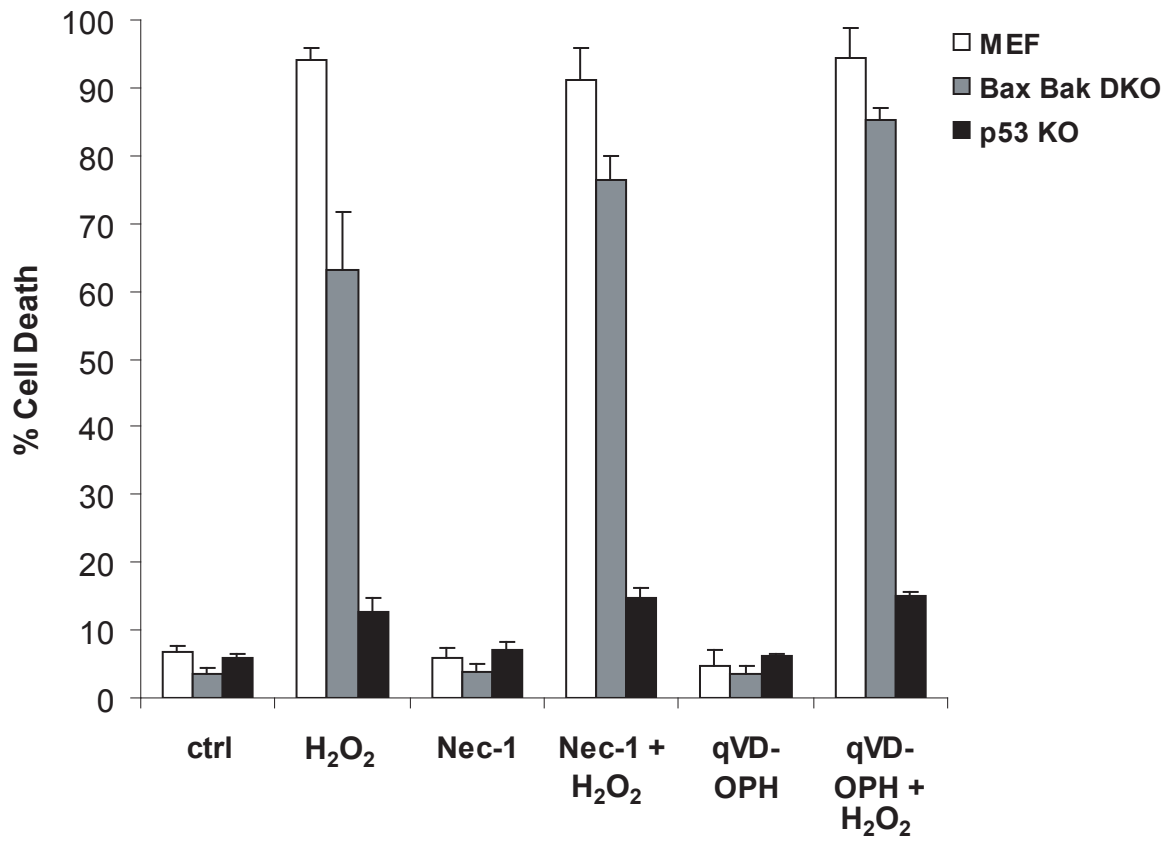

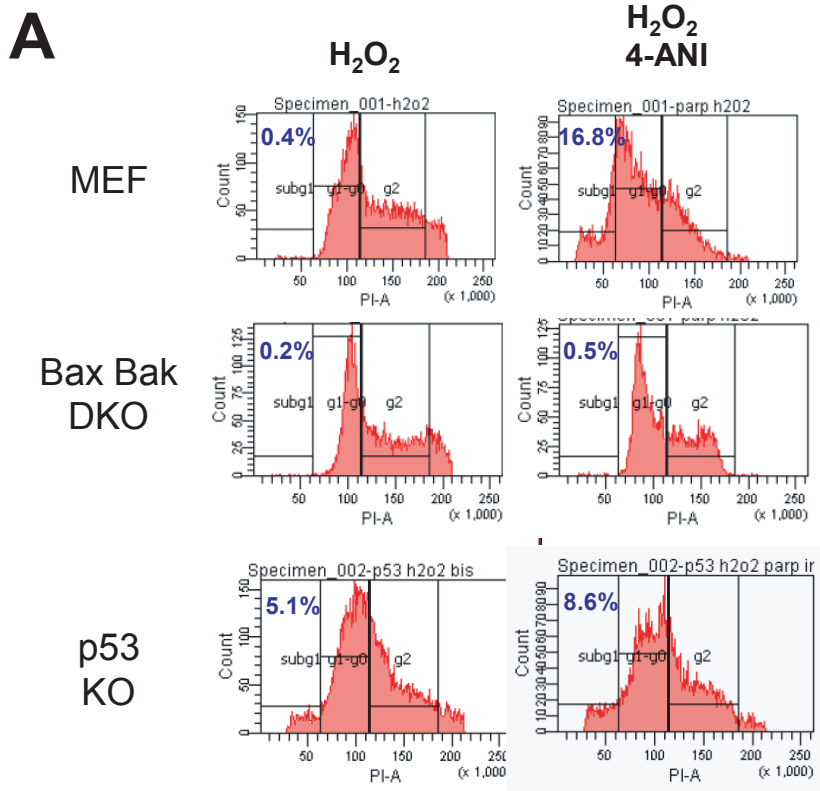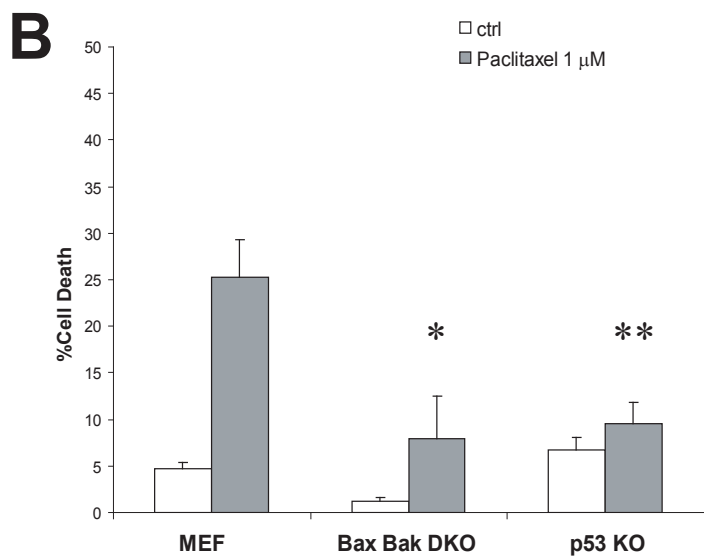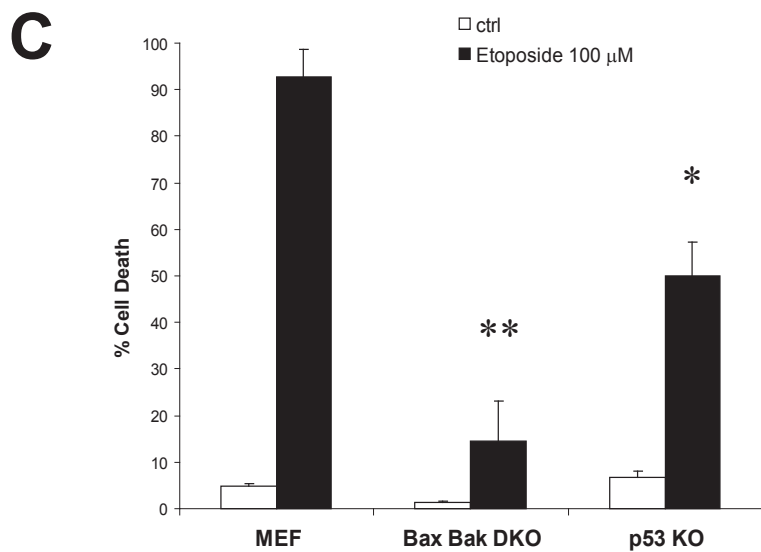

**A**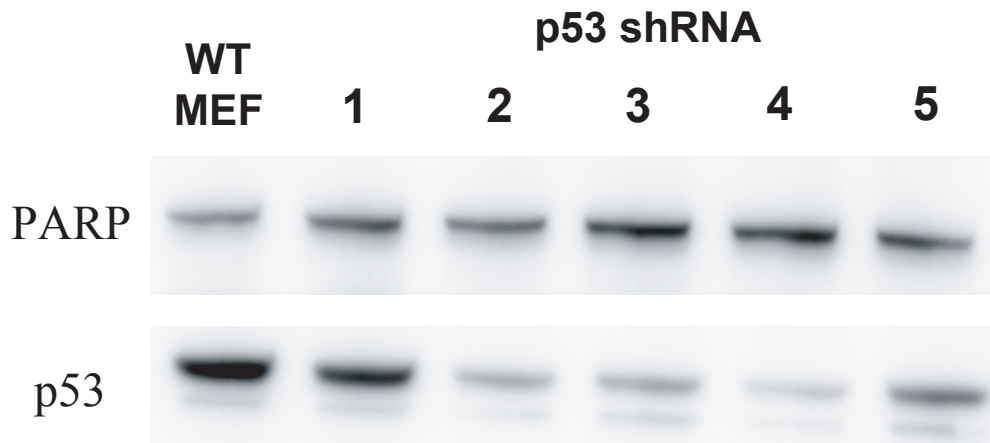**B**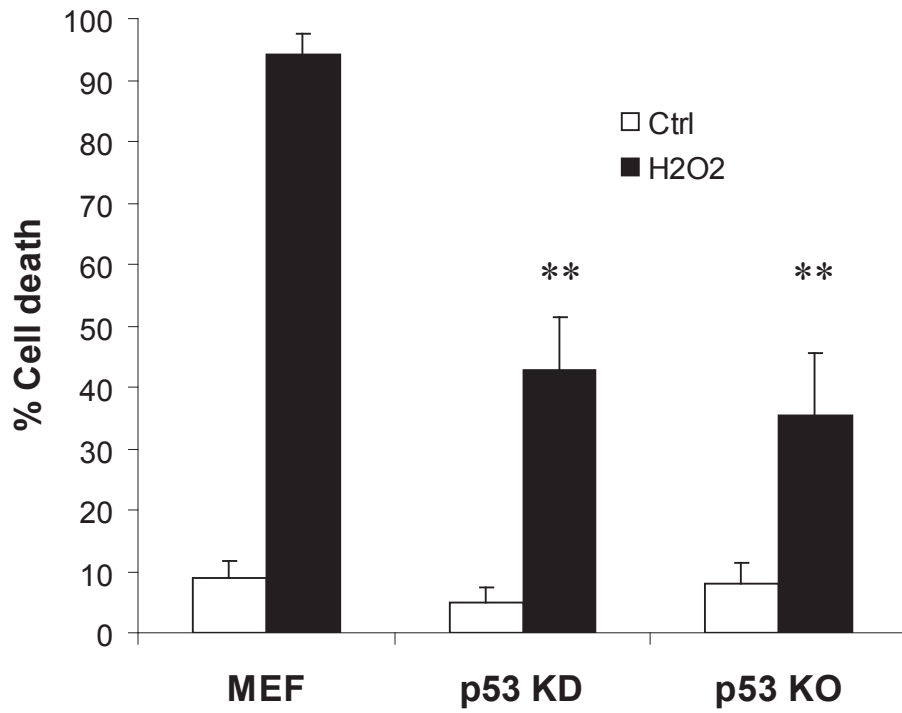

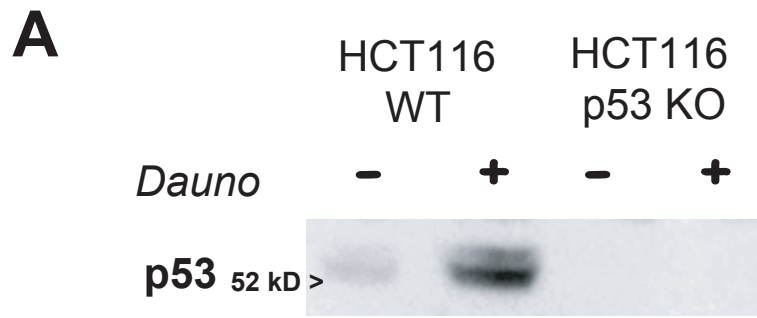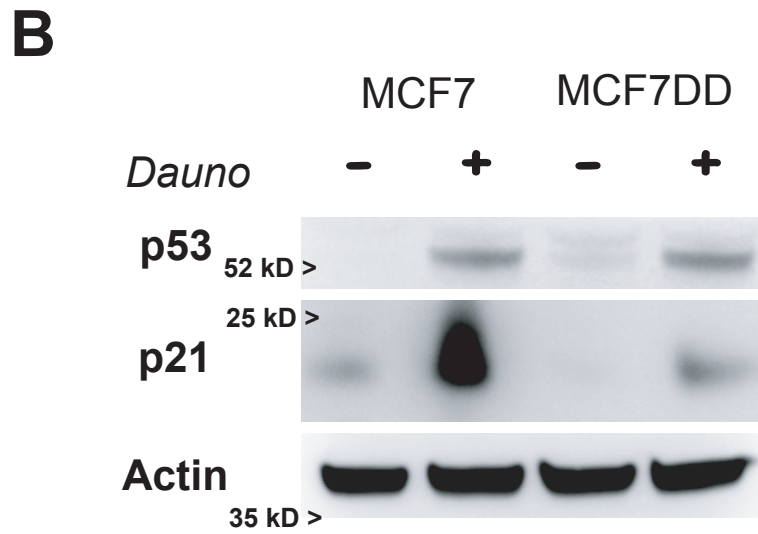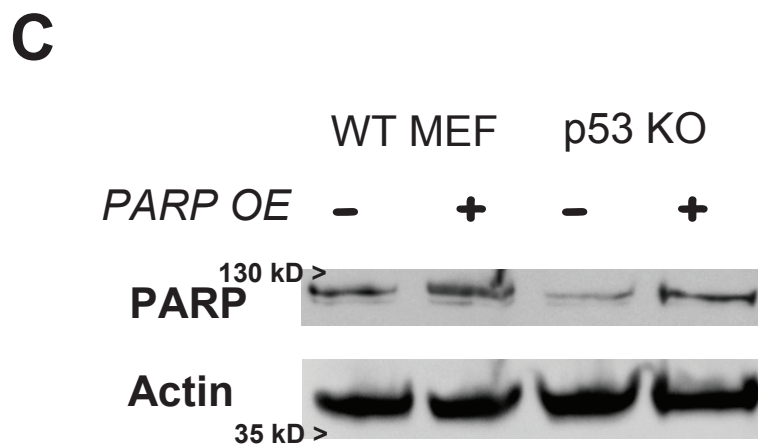

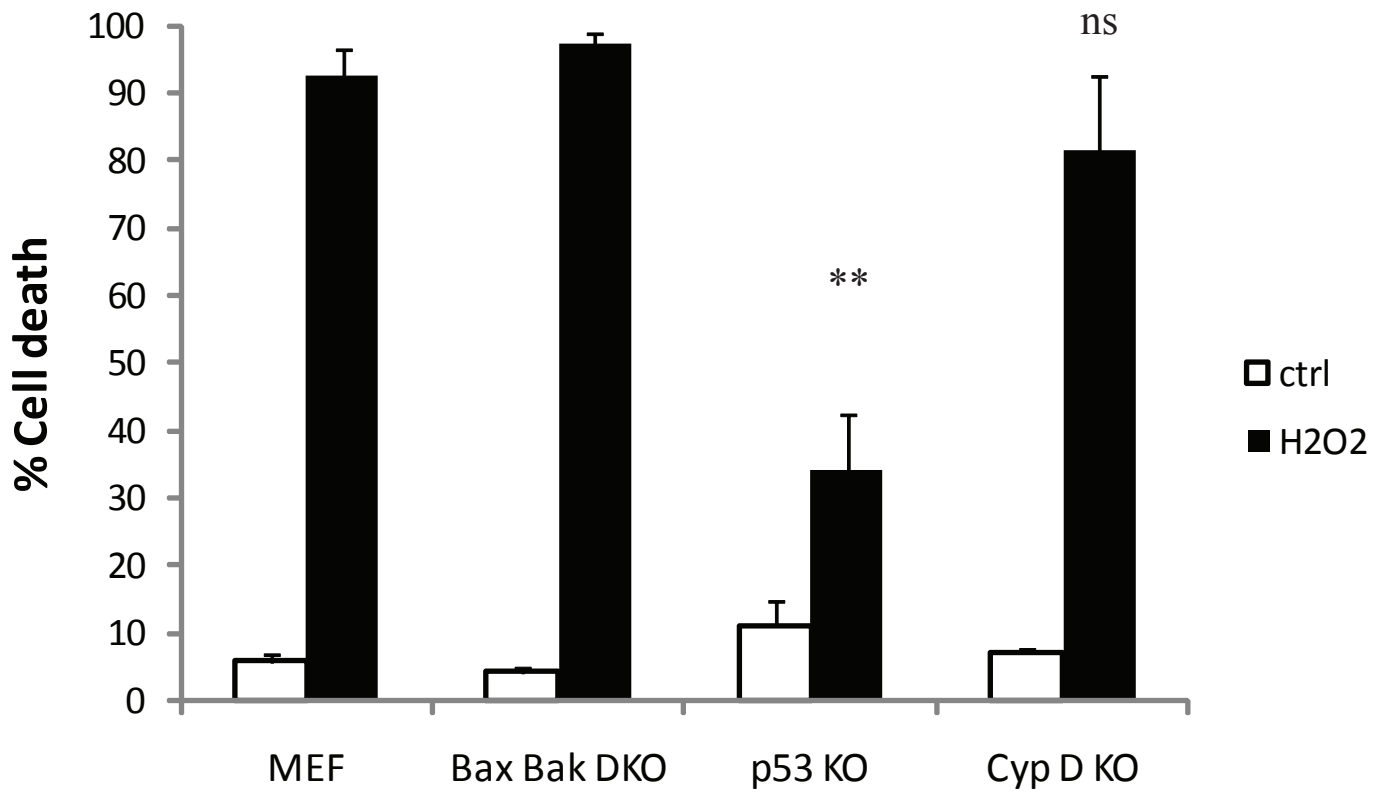

|   | <b>Gene</b> | <b>cloneName</b>     |
|---|-------------|----------------------|
| 1 | Trp53       | NM_011640.1-1908s1c1 |
| 2 | Trp53       | NM_011640.1-1271s1c1 |
| 3 | Trp53       | NM_011640.1-1649s1c1 |
| 4 | Trp53       | NM_011640.1-1223s1c1 |
| 5 | Trp53       | NM_011640.1-1013s1c1 |

Supplement: cdd201352x1.pdf [file cdd201352x1.pdf]
